# Supplementary material
Source: Springer Nature journal article supplement (https://www.springermedizin.de/resource/supplementary/13012_2006_42_MOESM4_ESM.pdf/9629122)
Supplement: MOESM4 [file 9629122]

## Flexibility

## Control

### Team Culture

- Cohesion
- Morale
- Human resource development
- Mutual support

### Hierarchical Culture

- Clear lines of authority over organizational processes
- Respect for formal hierarchy
- Adherence to rules
- Stability and predictability

### Entrepreneurial Culture

- Flexibility and creativity
- Acquisition of resources
- Responding to changes in external environment
- Growth and entrepreneurship

### Rational Culture

- Clarity of tasks
- Planning and productivity
- Efficiency
- Measurable outcomes

Internal

External
